# Supplementary material for: Adsorption of Hexavalent Chromium by Sodium Alginate Fiber Biochar Loaded with Lanthanum
Source: Materials (Basel). 2021 Apr 26;14(9):2224. doi: 10.3390/ma14092224 (PMC8123644; doi:10.3390/ma14092224)
Supplement: Supplementary file 1 [file materials-14-02224-s001.zip › materials-1067537-supplementary.pdf]

# Adsorption of Hexavalent Chromium by Sodium Alginate Fiber Biochar Loaded with Lanthanum

Xinzhe Sun <sup>1</sup>, Peng Guo <sup>2</sup>, Yuanyuan Sun <sup>1,\*</sup> and Yuqian Cui <sup>1,\*</sup>

<sup>1</sup> College of Environmental Science and Engineering, Qingdao University, Qingdao 266071, China; 2018025497@qdu.edu.cn

<sup>2</sup> School of Chemical Engineering, China University of Petroleum (East China), Qingdao 266580, China; guopeng@upc.edu.cn

\* Correspondence: cuiyq@qdu.edu.cn (Y.C.); sunyy@qdu.edu.cn (Y.S.); Tel.: +86 13793235399 (Y.C.); +86 15264230805 (Y.S.)

## 1. Text S1: Langmuir and Freundlich isotherm models

$$\text{Langmuir adsorption isothermal model: } \frac{C_e}{q_e} = \frac{C_e}{q_m} + \frac{1}{bq_m}, (1)$$

$$\text{Freundlich adsorption isothermal model: } \log q_e = \frac{1}{n} \log C_e + \log K_f, (2)$$

Where  $q_e$  (mg/g) represents the adsorption amount of the adsorbents per unit with the adsorbent at adsorption equilibrium,  $C_e$  (mg/L) represents the concentration of the adsorbents at adsorption equilibrium,  $q_m$  (mg/g) represents the maximum adsorption capacity of the adsorbents, and  $b$  represents the adsorption coefficient and the affinity strength between adsorbents and adsorbents. In addition,  $K_f$  is the adsorption capacity constant, indicating the adsorption capacity of the adsorbent. The  $n$  value may reflect the heterogeneity of the adsorbent or the adsorption reaction strength.

## 2. Text S2: Pseudo-first- and pseudo-second-order kinetic models

$$\text{Pseudo-first-order kinetic equation: } \ln(q_e - q_t) = \ln q_e - k_1 t, (3)$$

$$\text{Pseudo-second-order kinetic equation: } \frac{t}{q_t} = \frac{1}{k_2 q_e^2} + \frac{t}{q_e}, (4)$$

Where  $q_e$  and  $q_t$  (mg/g) are the amount of Cr (VI) adsorbed on the adsorbent at equilibrium at any time  $t$  (min), respectively.  $k_1$  and  $k_2$  are the separate rate constants for the pseudo-first-order and pseudo-second-order sorption models.

## 3. Text S3: Adsorption thermodynamics

$$\text{Thermodynamic formula: } \ln K_D = \frac{\Delta S}{R} - \frac{\Delta H}{RT}, (5)$$

The thermodynamic parameter of adsorption is the Gibbs free energy change ( $\Delta G$ , kJ·mol<sup>-1</sup>), the enthalpy change ( $\Delta H$ , kJ·mol<sup>-1</sup>) and the entropy change ( $\Delta S$ , J·mol<sup>-1</sup>·K<sup>-1</sup>). The thermodynamic equation of adsorption reaction reflects the change of the adsorption heat and temperature.  $R$  represents the ideal gas constant, of which the value is 8.314 J·mol<sup>-1</sup>·K<sup>-1</sup>;  $T$  is the thermodynamic temperature (K); and  $K_D$  (L·g<sup>-1</sup>) represents the adsorption equilibrium constant, which can be calculated by the Freundlich model.

The linear fitting of  $\ln K_D$  and  $1/T$  resulted in a line, and the enthalpy and entropy changes of the adsorption reaction were calculated by its slope and interception. In general, if  $\Delta G < 0$ , the adsorption reaction is spontaneous; if  $\Delta G > 0$ , it is a spontaneous reac-

tion, and it can undertake the reverse. If  $\Delta H > 0$ , the adsorption reaction is endothermic reaction; if  $\Delta H < 0$ , the adsorption reaction is an exothermic reaction; if  $\Delta S > 0$ , that is, the adsorption reaction of entropy, said confusion degree increases the adsorption system, and is advantageous to the spontaneous reaction.

**Table S1.** Physical properties of the different samples.

| Samples       | Surface Area (m <sup>2</sup> /g) | Pore Volume (cm <sup>3</sup> /g) |                    | D <sub>p</sub> (nm) |
|---------------|----------------------------------|----------------------------------|--------------------|---------------------|
|               | S <sub>BET</sub>                 | V <sub>total</sub>               | V <sub>micro</sub> |                     |
| 700 °C La-BC  | 8.21                             | 0.0037                           | 0.0169             | 10.9198             |
| 800 °C La-BC  | 38.61                            | 0.0328                           | 0.0196             | 4.0095              |
| 900 °C La-BC  | 177.41                           | 0.2515                           | 0.0803             | 6.2749              |
| 1000 °C La-BC | 52.08                            | 0.0547                           | 0.0255             | 5.2147              |

**Table S2.** Parameters of the Cr (VI) adsorption isotherms based on the Freundlich and Langmuir models.

| Materials     | Langmuir Model        |          |                | Freundlich Model |       |                |
|---------------|-----------------------|----------|----------------|------------------|-------|----------------|
|               | q <sub>m</sub> (mg/g) | b (L/mg) | R <sup>2</sup> | K <sub>f</sub>   | n     | R <sup>2</sup> |
| 700 °C La-BC  | 41.4                  | 0.0041   | 0.976          | 0.505            | 1.543 | 0.929          |
| 800 °C La-BC  | 67.4                  | 0.0049   | 0.953          | 2.255            | 2.098 | 0.950          |
| 900 °C La-BC  | 104.9                 | 0.0037   | 0.962          | 1.715            | 1.716 | 0.964          |
| 1000 °C La-BC | 49.9                  | 0.0042   | 0.994          | 0.776            | 1.655 | 0.963          |

**Table S3.** Parameters of the Cr (VI) adsorption kinetics based on the pseudo-first-order and pseudo-second-order dynamic models.

| Materials     | Pseudo-first-order model |                                   |                | Pseudo-Second-Order Model |                                   |                |
|---------------|--------------------------|-----------------------------------|----------------|---------------------------|-----------------------------------|----------------|
|               | q <sub>e</sub> (mg/g)    | K <sub>1</sub> × 10 <sup>-2</sup> | R <sup>2</sup> | q <sub>e</sub> (mg/g)     | K <sub>2</sub> × 10 <sup>-2</sup> | R <sup>2</sup> |
| 700 °C La-BC  | 14.3                     | 15.19                             | 0.9944         | 14.26                     | 0.95                              | 0.9880         |
| 800 °C La-BC  | 20.4                     | 24.51                             | 0.9696         | 20.42                     | 0.40                              | 0.9880         |
| 900 °C La-BC  | 32.4                     | 10.96                             | 0.9698         | 32.39                     | 1.33                              | 0.9998         |
| 1000 °C La-BC | 15.5                     | 15.21                             | 0.9428         | 15.49                     | 2.94                              | 0.9995         |

**Table S4.** Thermodynamic parameters for chromate adsorption with La-BC (900 °C).

| Temperature (K) | Thermodynamic Parameters |                |             |
|-----------------|--------------------------|----------------|-------------|
|                 | ΔH (KJ/mol)              | ΔS (J/(mol·K)) | ΔG (KJ/mol) |
| 298             | 41.66                    | 144.6          | -1.44       |
| 308             |                          |                | -2.78       |
| 318             |                          |                | -4.059      |

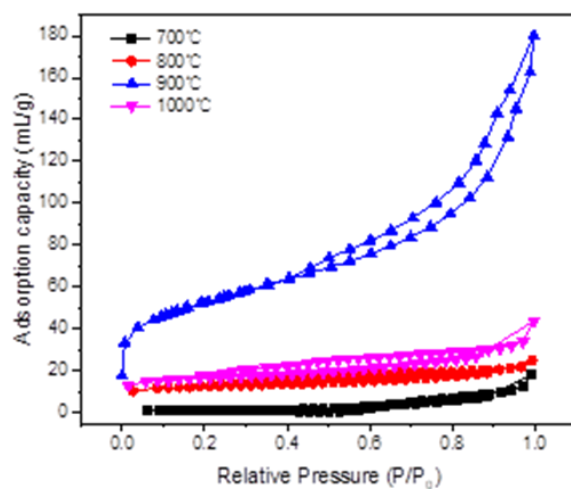

**Figure S1.** Nitrogen adsorption/desorption isotherms for different samples.

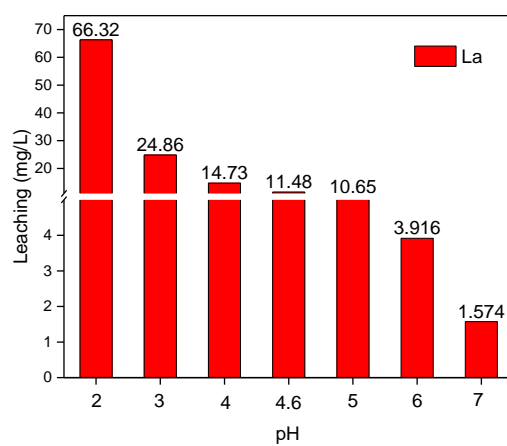

**Figure S2.** The leaching rate of lanthanum when the pH is in the range 2–7.
